# Supplementary material
Source: PubMed Central journal article supplement (PMC55356)

Profile #1

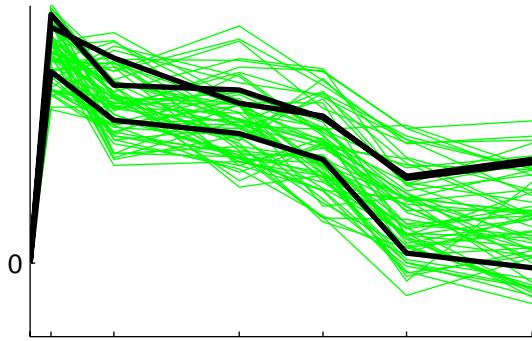

Profile #2

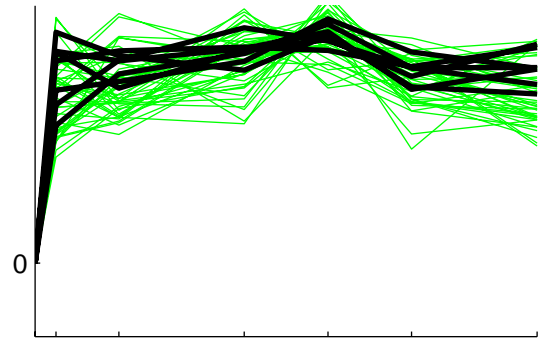

Profile #3

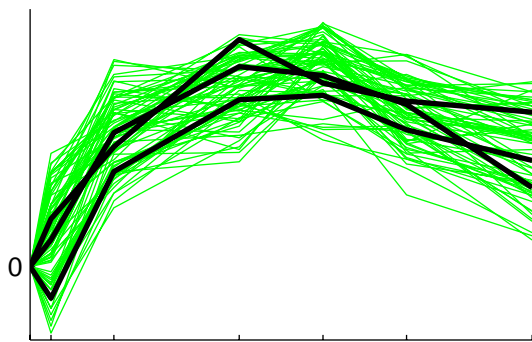

Profile #4

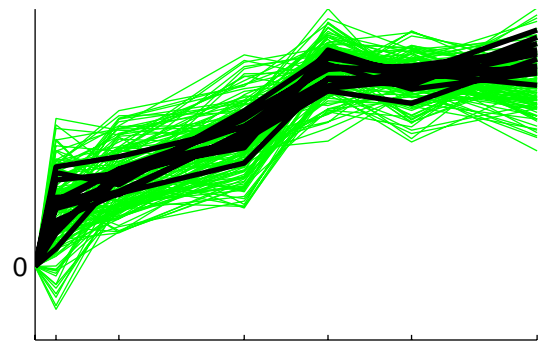

Profile #5

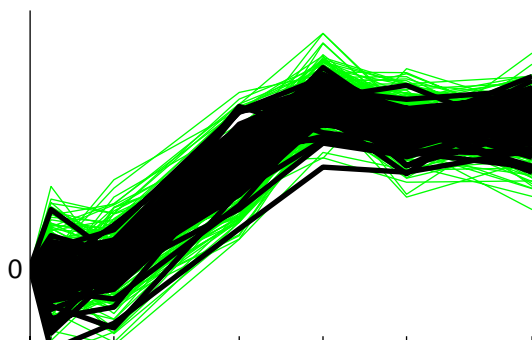

Profile #6

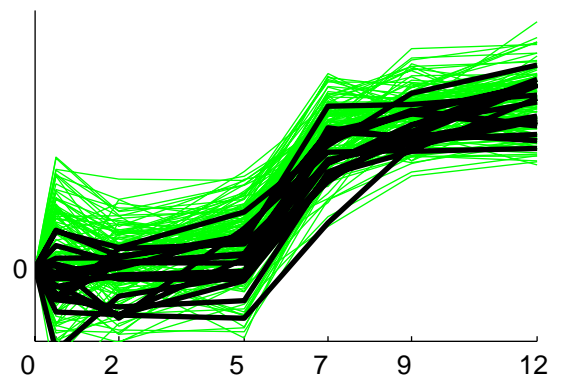

Profile #7

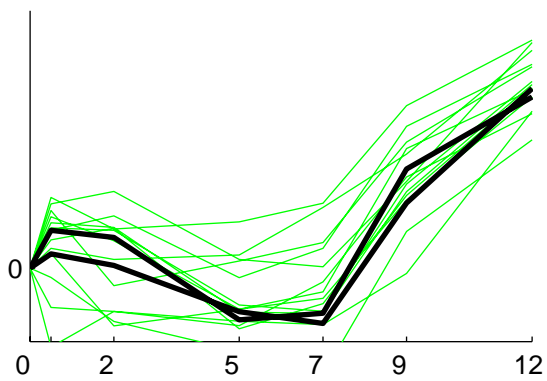

Supplement: pnas_161273698_4.pdf [file pnas_161273698_4.pdf]

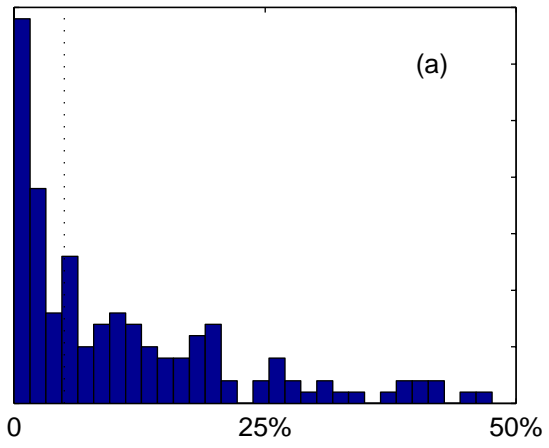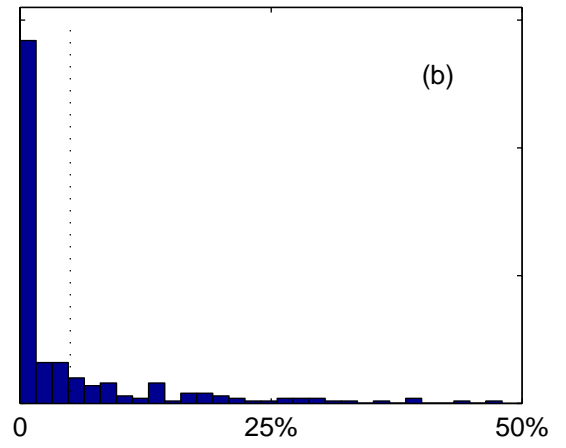

Supplement: pnas_161273698_5.pdf [file pnas_161273698_5.pdf]
